# Supplementary material for: Identification of novel prognostic biomarkers in the TF-enhancer-target regulatory network in hepatocellular carcinoma and immune infiltration analysis
Source: Front Genet. 2023 Mar 29;14:1158341. doi: 10.3389/fgene.2023.1158341 (PMC10090374; doi:10.3389/fgene.2023.1158341)
Supplement: Supplementary file 2 [file DataSheet2.XLSX]

## Sheet: DAPK1
DAPK1	Well 1	Well 2	CT	GAPDH	Well 1	Well 2	CT	ΔCT		DAPK1	Well 1	Well 2	CT	GAPDH	Well 1	Well 2	CT	ΔCT
N1	30.08	30.6	30.34	N1	20.98	21.59	21.285	9.055		T1	29.95	30.41	30.18	T1	20.93	21.9	21.415	8.765
N2	30.8	30.02	30.41	N2	20.78	21.03	20.905	9.505		T2	29.52	29.23	29.375	T2	20.85	21.6	21.225	8.15
N3	30.37	30.6	30.485	N3	22.02	21.81	21.915	8.57		T3	30.84	30.62	30.73	T3	18.58	19.2	18.89	11.84
N4	30.37	30.16	30.265	N4	19.6	19.54	19.57	10.695		T4	28.97	29.62	29.295	T4	21.39	21.49	21.44	7.855
N5	33.79	34.35	34.07	N5	20.54	20.84	20.69	13.38		T5	30.01	30.31	30.16	T5	20.32	21.09	20.705	9.455
N6	33.59	33.69	33.64	N6	19.07	20.79	19.93	13.71		T6	30.14	30.19	30.165	T6	20.25	19.67	19.96	10.205
N7	31.25	32.49	31.87	N7	21.28	21.23	21.255	10.615		T7	31.13	31.67	31.4	T7	19.4	19.67	19.535	11.865
N8	34.95	31.14	33.045	N8	20.6	20.86	20.73	12.315		T8	33.02	33.07	33.045	T8	20.94	20.83	20.885	12.16
N9	34.64	35.3	34.97	N9	24.89	24.88	24.885	10.085		T9	38.04	38.04	38.04	T9	25.12	25.19	25.155	12.885
N10	30.46	30.67	30.565	N10	21.12	20.18	20.65	9.915		T10	31.2	31.2	31.2	T10	21.63	20.88	21.255	9.945
N11	32.4	32.28	32.34	N11	21.41	21.49	21.45	10.89		T11	31.36	31.66	31.51	T11	20.48	20.87	20.675	10.835
N12	30.05	30.25	30.15	N12	19.81	20.31	20.06	10.09		T12	29.28	29.96	29.62	T12	21.57	20.92	21.245	8.375
N13	30.16	30.6	30.38	N13	21.35	21.57	21.46	8.92		T13	29.95	30.21	30.08	T13	22.51	22.04	22.275	7.805
N14	32.58	32.72	32.65	N14	21.69	21.76	21.725	10.925		T14	39.54	39.54	39.54	T14	25.45	25.61	25.53	14.01
N15	32.54	33.31	32.925	N15	21.63	21.89	21.76	11.165		T15	32.89	33.15	33.02	T15	20.26	20.57	20.415	12.605
N16	30.44	30.08	30.26	N16	20.71	20.89	20.8	9.46		T16	32.32	32.07	32.195	T16	21.35	22	21.675	10.52
N17	29.52	29.5	29.51	N17	22.08	20.41	21.245	8.265		T17	36.55	36.45	36.5	T17	25.22	24.97	25.095	11.405
N18	32.2	32.58	32.39	N18	22.28	22.88	22.58	9.81		T18	32.33	31.77	32.05	T18	21.35	22.59	21.97	10.08
N19	32.52	32.62	32.57	N19	22.37	23.25	22.81	9.76		T19	32.35	32.79	32.57	T19	20.03	20.68	20.355	12.215
N20	29.49	29.34	29.415	N20	20.19	21.11	20.65	8.765		T20	32.1	32.24	32.17	T20	21.79	22.65	22.22	9.95
N21	28.83	29.49	29.16	N21	21.79	21.9	21.845	7.315		T21	29.54	29.5	29.52	T21	21.23	19.9	20.565	8.955
N22	29.43	28.79	29.11	N22	22.01	22.16	22.085	7.025		T22	29.17	29.03	29.1	T22	18.54	18.49	18.515	10.585
N23	30.77	28.76	29.765	N23	21.49	21.46	21.475	8.29		T23	30.72	30.46	30.59	T23	20.28	20.77	20.525	10.065
N24	29.2	29.47	29.335	N24	21.06	20.74	20.9	8.435		T24	32.51	31.72	32.115	T24	22.37	21.55	21.96	10.155
N25	30.29	29.4	29.845	N25	20.53	20.49	20.51	9.335		T25	33.42	33.57	33.495	T25	21.55	21.92	21.735	11.76
N26	30.27	30.17	30.22	N26	22.34	22.29	22.315	7.905		T26	34.8	34.72	34.76	T26	24.48	24.01	24.245	10.515
N27	30.94	30.67	30.805	N27	20.29	20.34	20.315	10.49		T27	32.13	31.92	32.025	T27	21.67	21.04	21.355	10.67
N28	30.06	30.47	30.265	N28	20.72	21.07	20.895	9.37		T28	32.78	32.05	32.415	T28	21.37	21.24	21.305	11.11
N29	30.53	30.05	30.29	N29	20.94	21.57	21.255	9.035		T29	35.81	36.63	36.22	T29	23.53	24.14	23.835	12.385
N30	32.17	32.98	32.575	N30	23.03	23.11	23.07	9.505		T30	35.2	35.57	35.385	T30	23.16	23.98	23.57	11.815

## Sheet: Cell
DAPK1	Well 1	Well 2	Average	SD	GAPDH	Well 1	Well 2	Average	SD		ΔCT	ΔΔCT	Relative
LO2	28.9	29.42	29.17±0.213	0.21276	LO2	15.21	15.63	15.33±0.216	0.216384	0.303356	13.84±0.30	0±0.30	1.0(0.81-1.23)
	29.19					15.14
HepG2	29.86	29.9	29.91±0.049	0.0498888	HepG2	15.12	15.14	15.06±0.104	0.10403	0.114965	14.85±0.11	-1.01±0.11	0.50(0.46-0.54)
	29.98					14.91
Huh7	29.19	29.94	29.66±0.332	0.332499	Huh7	14.52	14.45	14.44±0.066	0.0654896	0.338497	15.22±0.34	-1.38±0.34	0.38(0.30-0.49)
	29.84					14.36
